February 7, 2022

**Assessment of Genetic Susceptibility to Multiple Primary Cancers  
through Whole-Exome Sequencing in Two Large Multi-Ancestry Studies**

Taylor B. Cavazos<sup>1</sup>, Linda Kachuri<sup>2</sup>, Rebecca E. Graff<sup>2,3</sup>, Jovia L. Nierenberg<sup>2,5</sup>, Khanh K. Thai<sup>3</sup>, Stacey Alexeeff<sup>3</sup>,  
Stephen Van Den Eeden<sup>3</sup>, Douglas A. Corley<sup>3</sup>, Lawrence H. Kushi<sup>3</sup>, Regeneron Genetics Center<sup>4</sup>, Thomas J.  
Hoffmann<sup>2</sup>, Elad Ziv<sup>5</sup>, Laurie Habel<sup>3</sup>, Eric Jorgenson<sup>4</sup>, Lori C. Sakoda<sup>3,6</sup>, and John S. Witte<sup>2,7,8</sup>

**Affiliations:**

<sup>1</sup> Biological and Medical Informatics, University of California San Francisco, San Francisco, CA 94158

<sup>2</sup> Department of Epidemiology and Biostatistics, University of California San Francisco, San Francisco, CA 94158

<sup>3</sup> Division of Research, Kaiser Permanente Northern California, Oakland, CA 94612

<sup>4</sup> Regeneron Genetics Center, Tarrytown, New York 10591

<sup>5</sup> Department of Medicine, University of California San Francisco, San Francisco, CA 94158

<sup>6</sup> Department of Health Systems Science, Kaiser Permanente Bernard J. Tyson School of Medicine, Pasadena, CA 91101

<sup>7</sup> Department of Epidemiology and Population Health, Stanford University, Stanford, CA 94305

<sup>8</sup> Department of Biomedical Data Science, Stanford University, Stanford, CA 94305

**Corresponding Author:**

John S. Witte

Department of Epidemiology and Population Health

Alway Building, Stanford University

300 Pasteur Drive, Stanford, CA 94305

Phone: (415) 502-6882

Email: [jswitte@stanford.edu](mailto:jswitte@stanford.edu)

**CONFLICTS OF INTERESTS**

J.S. Witte is a non-employee, cofounder of Avail Bio. E. Jorgenson and additional authors listed under "Regeneron Genetics Center" are full-time employees of Regeneron Pharmaceuticals. No disclosures were reported for the other authors.

**Word Count: 4,217**

**Figures/ Tables: 4**

## **ABSTRACT**

Up to one of every six individuals diagnosed with one cancer will be diagnosed with a second primary cancer in their lifetime. Genetic factors contributing to the development of multiple primary cancers, beyond known cancer syndromes, have been underexplored. To characterize genetic susceptibility to multiple cancers, we conducted a pan-cancer, whole-exome sequencing study of individuals drawn from two large prospective cohorts (6,429 cases, 165,853 controls). We created two groupings of individuals diagnosed with multiple primary cancers: 1) an overall combined set with at least two cancers across any of 36 organ sites; and 2) cancer-specific sets defined by an index cancer at one of 16 organ sites with at least 50 cases from each study population. We then investigated whether variants identified from exome sequencing were associated with these sets of multiple cancer cases in comparison to individuals with one and, separately, no cancers. We identified 22 variant-phenotype associations, 10 of which have not been previously discovered and were significantly overrepresented among individuals with multiple cancers, compared to those with a single cancer. Overall, we describe variants and genes that may play a fundamental role in the development of multiple primary cancers and improve our understanding of shared mechanisms underlying carcinogenesis. Further investigation of these findings may lead to new screening strategies for individuals at risk for multiple primary cancers.

1 **INTRODUCTION**

2 The substantial global burden of cancer coupled with increasing survival due to improved  
3 screening, surveillance, and treatments has yielded a growing number of cancer survivors who  
4 are at risk of developing a second primary cancer in their lifetime<sup>1,2</sup>. The prevalence of multiple  
5 primary cancers globally is estimated to be between 2 and 17%, with the wide range likely due to  
6 differences in cancer registration practices, case definitions, population characteristics, and  
7 follow-up times<sup>1,2</sup>. Cancer predisposition syndromes, such as Li-Fraumeni, Lynch, and hereditary  
8 breast and ovarian cancer, are known to increase the risk of multiple primary cancers; however,  
9 less than 2% of all cancers are attributed to hereditary cancer syndromes<sup>1</sup>. Genetic risk factors  
10 for multiple primary cancers beyond known syndromes are not well understood.

11  
12 Genome-wide association studies (GWAS) have implicated many common, low penetrance  
13 variants in 5p15 (*TERT-CLPTM1L*)<sup>3</sup>, 6p21 (*HLA*)<sup>4,5</sup>, 8q24<sup>6</sup>, and other loci in the risk of several  
14 cancer types. Additional studies have investigated pleiotropy in these regions or characterized  
15 cross-cancer susceptibility variants<sup>7,8</sup>. A pleiotropic locus has the potential to not only affect risk  
16 of many different cancer types, but also increase the likelihood that a single individual develops  
17 multiple primary cancers. In our prior work, we discovered that the rare pleiotropic variant  
18 *HOXB13* G84E had a stronger association with the risk of developing multiple primary cancers  
19 than of a single cancer<sup>9</sup>. This suggests that there may be increased power to detect pleiotropic  
20 variation in individuals with multiple primary cancers relative to those with only a single cancer.  
21 Identifying widespread pleiotropic signals is informative for understanding shared genetic  
22 mechanisms of carcinogenesis, toward the identification of informative markers for cancer  
23 prevention and precision medicine.

24  
25 In this study, we survey the landscape of rare and common variation in individuals with multiple  
26 primary cancers, single cancers, and cancer-free controls through whole-exome sequencing

27 (WES) in two large, multi-ancestry studies. We evaluate associations previously discovered in  
28 studies of individuals with a single cancer and find novel pleiotropic variation in individuals with  
29 multiple primaries.

30

## 31 **MATERIAL AND METHODS**

### 32 **Study Populations and Phenotyping**

33 Our study included ancestrally diverse individuals with multiple primary cancers or no cancer from  
34 two large prospective studies: the Kaiser Permanente Research Bank (KPRB) and the UK  
35 Biobank (UKB). From the KPRB, we included individuals who were previously genotyped through  
36 the Research Program on Genes, Environment and Health (RPGEH) and the ProHealth Study.  
37 For the UKB, we specifically studied participants from the 200K release of WES data, which also  
38 included individuals diagnosed with a single cancer<sup>10</sup>.

39

40 For both study populations, ascertainment of cancer diagnoses has been previously  
41 described<sup>11,12</sup>. Both studies included prevalent and incident diagnoses of malignant, borderline,  
42 and in situ primary tumors<sup>12</sup>. ICD codes indicating non-melanoma skin cancer or metastatic  
43 cancer were not considered primary tumors. Cancers were primarily defined according to the  
44 SEER site recode paradigm<sup>13</sup>. However, for hematologic cancers, we incorporated morphology  
45 following WHO classifications<sup>14</sup>, placing cancers into three major subtypes: lymphoid neoplasms,  
46 myeloid neoplasms, and NK- and T-cell neoplasms (Table S1). Cases were individuals with ICD-  
47 9 or ICD-10 codes for primary tumors at two or more distinct organ sites. In the KPRB, controls  
48 without a cancer diagnosis were matched 1:1 to cases on age at specimen collection, sex,  
49 genotyping array (which matched on self-reported race/ethnicity), and reagent kit. In the UKB,  
50 controls included all individuals without a cancer diagnosis.

51

52 In both study populations, we excluded duplicates/twins and first-degree relatives, retaining the  
53 individual from each related pair who had higher coverage at targeted sites. Following quality  
54 control (QC) of WES data (described below), the KPRB and UKB study populations used in this  
55 project included 3,111 and 3,318 cases with multiple primary cancers and 3,136 and 162,717  
56 cancer-free controls, respectively. The UKB also contributed 29,091 individuals with a single  
57 cancer diagnosis. While our study was primarily unselected for cancer type, prostate cancer cases  
58 were oversampled in the KPRB due to inclusion of individuals from the ProHealth Study.

59

### 60 **Genetic Ancestry and Principal Components Analysis**

61 Genetic ancestry was defined using genome-wide, imputed array data that underwent extensive  
62 QC, as previously described<sup>12</sup>. Ancestry principal components (PCs) were computed using  
63 flashPCA2<sup>15</sup> by projecting our study samples onto PCs defined by 1000G phase 3 reference  
64 populations<sup>16</sup>. Individuals were assigned to the closest reference population using distance from  
65 the top 10 PCs. Individuals with ancestral PCs greater than five standard deviations from the  
66 reference population mean were excluded. The final analytic dataset included individuals of  
67 European, African, East Asian, South Asian, and Hispanic/Latino ancestry (Figure S1). A total of  
68 N = 646 (10.2%) and N = 8,739 (5.26%) individuals were of non-European ancestry in the KPRB  
69 and UKB, respectively (Table 1).

70

### 71 **Whole-Exome Sequencing and Quality Control**

72 The Regeneron Genetics Center used the Illumina NovaSeq 6000 platform to perform WES for  
73 both study populations. Sample preparation and QC were performed using a high-throughput,  
74 fully-automated process that has been previously described in detail<sup>17</sup>. Briefly, following  
75 sequencing, reads were aligned to the GRCh38 reference genome and variants were called with  
76 WeCall<sup>17</sup> for the KPRB and DeepVariant<sup>18</sup> for the UKB. Samples with gender discordance, 20x  
77 coverage at less than 80% of targeted sites, and/or contamination greater than 5% were excluded.

78

79 Additional QC was applied to filter low quality variants and related individuals. First, genotype  
80 calls with low depth of coverage (DP) were updated to missing (DP < 7 for SNPs and DP < 10 for  
81 indels). Then, sites with low allele balance (AB) were removed. Specifically, variants without at  
82 least one sample having AB  $\geq$  15% for SNPs or AB  $\geq$  20% for indels were excluded. Additionally,  
83 variants with missingness > 10% and HWE p-value <  $10^{-15}$  were excluded. Following these steps,  
84 a total of ~3.51M high-quality sites were retained for the KPRB and ~15.92M were retained for  
85 the UKB; excluding singletons, there were ~1.36M and ~8.22M variants, respectively. In the UKB,  
86 the larger number of variants observed was due to rare variation present in the larger sample  
87 size; when restricting to common variants (MAF > 1%), there were ~186K and ~137K variants,  
88 respectively for the KPRB and UKB.

89

### 90 **Association Analyses in Individuals with Multiple Cancers versus Cancer-Free Controls**

91 Genetic association analyses of single variants and genes investigated the following cancer  
92 phenotypes: (1) diagnosis with at least two primary cancers across any of the 36 organ sites ("any  
93 2+ primary cancers") and (2) groupings of individuals defined by a shared index cancer at one of  
94 16 organ sites with at least 50 cases from each study population. ("cancer-specific analyses").  
95 Primary analyses compared multiple cancer cases to cancer-free controls. Within our cancer-  
96 specific analyses of 16 organ sites, there were cases shared across our index cancer groupings.  
97 For example, the set of individuals with at least one diagnosis of breast cancer overlaps with those  
98 having at least one ovarian cancer diagnosis.

99

100 Single-variant and gene-based association analyses were performed using REGENIE v2.2.4, a  
101 machine-learning approach for performing whole-genome regression that adjusts for case-control  
102 imbalance by applying saddlepoint approximation when the standard case-control p-value is less  
103 than  $0.05^{19}$ . We assessed single-variant associations for high-quality variants with minor allele

104 count (MAC) > 2. WES variants were functionally annotated using SnpEff v5.0<sup>20</sup> and dbNFSP  
105 v3.5<sup>21</sup> accessed through ANNOVAR<sup>22</sup>. Missense variants were classified using five algorithms:  
106 (1) SIFT (“D”); (2) HDIV from Polyphen2; (3) HVAR from Polyphen2; (4) LRT (“D”); and (5)  
107 MutationTaster (“A” or “D”). For our gene-based burden analyses, we used three minor allele  
108 frequency cut-offs (MAF < 0.5%, 1%, or 5%), including singletons, computed within each  
109 population. Following previous work, three gene-based models were evaluated<sup>23</sup>: (1) all rare  
110 variants with predicted loss-of-function (pLOF) by SnpEff, (2) pLOF and missense rare variants  
111 predicted to be deleterious by the above five classification algorithms, and (3) pLOF and missense  
112 rare variants predicted to be deleterious by at least one algorithm. Out of all allele frequency and  
113 burden combinations, we report the burden test with the lowest p-value. In the case of ties, we  
114 report the most restrictive grouping (fewest number of variants included). In our gene-based and  
115 single-variant analyses, we adjusted for covariates including age, top 10 PCs, and sex (except  
116 for sex-specific index cancers of the breast, cervix, ovary, uterus, other female genital organ, and  
117 prostate). In the KPRB population, we additionally adjusted for genotyping array and reagent kit,  
118 as they were used to perform case-control matching. In the UKB, we adjusted for flow cell (S2 vs  
119 S4), which differed for the initial 50K and subsequent 150K release of WES samples.

120  
121 Single-variant and gene-based burden analyses for each phenotype were combined across study  
122 populations in a fixed-effects meta-analysis using METASOFT<sup>24</sup> and metafor v3.0.2<sup>25</sup>,  
123 respectively. For our single-variant analyses, we report all suggestive, independent [linkage  
124 disequilibrium (LD)  $r^2 < 0.2$ ] associations with  $p < 5 \times 10^{-6}$ . For our gene-based analyses, we report  
125 all associations adjusted for the number of genes tested ( $p < 2.65 \times 10^{-6} = 0.05 / 18,842$ ). We report  
126 meta-analysis p-values (Main Text), except when a variant was unique to a single study  
127 population (Supplements).

128

## 129 **Distinguishing Susceptibility Signals for Multiple Cancers versus Single Cancers**

130 We also evaluated whether the variants and genes associated with the diagnosis of multiple  
131 primary cancers (versus non-cancer controls) remained associated when comparing individuals  
132 with multiple cancers to those diagnosed with a single cancer. These analyses assessed whether  
133 the variants or genes were pleiotropic for developing multiple cancers or general markers of  
134 susceptibility to a specific cancer. We undertook these analyses in the UKB sample only, since  
135 individuals diagnosed with a single primary cancer were not sequenced in the KPRB. Single-  
136 variant and gene-level analyses were implemented as described above. For each variant or gene  
137 of interest identified in our case-control analyses, we performed a case-case analysis comparing  
138 individuals diagnosed with multiple cancers to those diagnosed with a single cancer. For our  
139 cancer-specific analyses, we compared individuals diagnosed with the index cancer plus any  
140 other cancer to those diagnosed with the index cancer only. For example, for a finding discovered  
141 in our cancer-specific analysis of prostate cancer, we performed a case-case analysis comparing  
142 individuals diagnosed with prostate cancer plus any other cancer to individuals with only a  
143 prostate cancer diagnosis.

144

## 145 **RESULTS**

### 146 **Characterization of Multiple Primary Cancer Diagnoses in Two Large Study Populations**

147 Our meta-analyses included 6,429 cases with multiple primary cancers and 165,853 cancer-free  
148 controls (Table 1). All cases had at least two independent primary cancer diagnoses, and 656  
149 cases had more than two diagnoses (Figure S2). In the KPRB, the maximum number of cancer  
150 diagnoses for an individual was 6 ( $n = 1$ ) and in the UKB, the maximum number was 5 ( $n = 2$ ).  
151 Overall, 36 unique cancer sites were represented across multiple cancer cases in the two study  
152 populations, with 180 unique pairs of sites (e.g., breast and melanoma) and 298 unique pairs of  
153 sites and diagnostic sequence (e.g., breast followed by melanoma) (Table S2). Only 51 of the  
154 298 ordered pairs had at least 25 cancer cases when grouping individuals by first and second  
155 cancer diagnosis (i.e., ignoring any subsequent cancer diagnoses; Table S2, Figure 1). The top



156 ordered pairs represented in the combined study populations were prostate then melanoma (N =  
157 221), cervix then breast (N = 202), melanoma then prostate (N = 180), breast then melanoma (N  
158 = 174), and prostate then colorectal (N = 170). Prostate, breast, melanoma, colorectal, and cervix  
159 were the most common sites of first cancer diagnoses (Figure 1). The prevalence of each cancer  
160 pair was similar in the KPRB and UKB (Figure S3). As most individual cancer pairs were  
161 underpowered for downstream analysis, we considered all multi-cancer cases combined, as well  
162 as groupings of individuals with a shared index cancer (16 cancers) (Figure S4, Table S3). Among  
163 those with multiple cancers, the cancers with the largest number of cases were prostate (N =  
164 1,977; oversampled in KPRB), breast (N = 1,874), melanoma (N = 1,443), colorectal (N = 1,324),  
165 and urinary bladder (N = 829).

166

### 167 **Exome-wide Single Variant Association Analyses**

168 We found 22 associations ( $p < 5 \times 10^{-6}$ ) between individual variants and the multiple cancer  
169 phenotypes (i.e., either any 2+ primary cancers or cancer-specific analyses) (Figure 2, Table S4).  
170 We found an additional four associations (Figure S5) in our cancer-specific analyses of lymphoid  
171 and myeloid neoplasms; however, we assumed them to represent somatic alterations in the blood  
172 as they had low allele balance across our heterogenous samples (Figure S6) and occur in genes  
173 known to be impacted by clonal hematopoiesis of indeterminate potential (CHIP)<sup>26</sup>. Results were  
174 relatively homogeneous across the KPRB and UKB study populations (Table S4).

175

176 We detected two variants associated with any 2+ primary cancers, rs555607708 (OR [95% CI] =  
177 2.72 [1.79, 4.15],  $p = 3.10 \times 10^{-6}$ ), a frameshift variant in *CHEK2* known to be associated with risk  
178 at many cancer sites<sup>27</sup>, and rs146381257 (OR [95% CI] = 7.82 [3.28, 18.62],  $p = 3.45 \times 10^{-6}$ ), a  
179 5'upstream variant in *ZNF106*. The risk-increasing allele for rs555607708 (*CHEK2*) was most  
180 commonly found among individuals with at least one breast cancer (41.9%), prostate cancer  
181 (30.6%), melanoma (22.6%), or cervical cancer (16.1%) (Figure 2). For rs146381257 (*ZNF106*),

182 frequencies were increased in prostate cancer (33.3%), lung cancer (28.6%), breast cancer  
183 (28.6%), lymphoid neoplasms (23.8%), urinary bladder cancer (19.0%), pancreatic cancer  
184 (14.3%), and kidney cancer (14.3%).

185

186 Cancer-specific analyses identified 10 associations between previously reported risk variants for  
187 a single cancer and risk of diagnosis with that cancer plus any other cancer (Figure 2). Notably,  
188 we detected an association with the *MC1R* variant rs1805008 for melanoma<sup>28</sup> (OR [95% CI] =  
189 1.56 [1.35, 1.81],  $p = 2.73 \times 10^{-9}$ ), when comparing all individuals with at least one melanoma  
190 diagnosis plus any other cancer diagnosis to cancer-free controls. We also replicated the  
191 previously associated prostate-specific antigen (PSA) variant, rs17632542<sup>29</sup> (*KLK3*, OR [95% CI]  
192 = 1.49 [1.28, 1.73],  $p = 3.87 \times 10^{-7}$ ) in individuals with at least one prostate cancer diagnosis. In  
193 addition, we replicated associations between missense risk variant rs6998061 (8q24 locus,  
194 *POU5F1B*) and multiple tumor types in both our prostate cancer-specific analysis<sup>30</sup> (OR [95% CI]  
195 = 1.23 [1.13, 1.33],  $p = 4.39 \times 10^{-7}$ ) and our colorectal cancer-specific analysis<sup>31</sup> (OR [95% CI] =  
196 1.25 [1.15, 1.37],  $p = 1.06 \times 10^{-7}$ ).

197

198 The remaining variants demonstrating associations with multiple cancer phenotypes were not  
199 previously associated with any single cancer (Figure 2). They included a variant discovered in our  
200 breast cancer-specific analysis, rs143745791 (*NCBP1*, OR [95% CI] = 5.95 [2.79, 12.67],  $p =$   
201  $3.76 \times 10^{-6}$ ), for which 16.2% of carriers, restricted to cases, had a breast and cervical cancer  
202 diagnosis, and a variant discovered in our urinary bladder cancer-specific analysis, rs141647689  
203 (*SDK1*, OR [95% CI] = 9.29 [3.63, 23.80],  $p = 3.45 \times 10^{-6}$ ), for which 14.3% of carriers also had  
204 prostate cancer (Figure 2). Three variants found in our lymphoid neoplasm-specific analysis had  
205 increased frequencies in cases who also had a diagnosis of prostate cancer: rs535484207  
206 (*RANBP2*, OR [95% CI] = 256.01 [26.82, 2,442.95],  $p = 1.46 \times 10^{-6}$ ), rs139586367 (*UFL1*, OR [95%  
207 CI] = 284.06 [27.95, 2,886.15],  $p = 1.79 \times 10^{-6}$ ), and rs191064896 (*ADGRB1*, OR [95% CI] = 108.36

208 [15.02, 781.08],  $p = 3.32 \times 10^{-6}$ ), where 21.4%, 40.0%, and 25.0% of carriers for the risk-increasing  
209 allele, for each respective variant, had both cancers. The *ADGRB1* variant was also present at  
210 increased frequencies among individuals with a lymphoid neoplasm and breast cancer diagnosis  
211 (25.0%, Figure 2).

212

### 213 **Gene-Based Analyses of Multiple Cancers**

214 Out of 18,842 genes tested, we found 11 significant associations ( $p < 2.65 \times 10^{-6}$ ) across our  
215 analyses of any 2+ primary cancers and our cancer-specific analyses (Figure 3, Table S5). An  
216 additional four CHIP genes (*ASXL1*, *TET2*, *JAK2*, and *DDX41*) were significantly associated with  
217 myeloid neoplasms and are likely driven by somatic alterations (Figure S7).

218

219 In our analyses of any 2+ primary cancers and our breast cancer-specific analysis, we replicated  
220 associations for known pleiotropic genes, *BRCA2* (pLOF,  $p = 3.76 \times 10^{-11}$  and  $1.91 \times 10^{-9}$ ) and  
221 *CHEK2* (pLOF + missense,  $p = 2.95 \times 10^{-11}$  and  $1.67 \times 10^{-8}$ ) (Figure 3). *BRCA2* also emerged in our  
222 ovarian cancer-specific analysis (pLOF,  $p = 1.91 \times 10^{-9}$ ). We found associations between the  
223 known prostate cancer gene *ATM* and any 2+ primary cancers and in our prostate cancer-specific  
224 analysis (pLOF + missense,  $p = 9.84 \times 10^{-7}$  and  $2.56 \times 10^{-6}$ ). Additional associations were observed  
225 between *SAMHD1* and *SLC642* and any 2+ primary cancers (pLOF + missense,  $p = 2.40 \times 10^{-7}$   
226 and  $p = 5.44 \times 10^{-7}$ , respectively). *BRCA1* also surfaced in the breast cancer-specific analysis  
227 (pLOF,  $p = 6.68 \times 10^{-8}$ ), as did *AHCTF1* in the head and neck cancer-specific analysis (pLOF +  
228 missense,  $p = 1.25 \times 10^{-6}$ ).

229

230 Functional variants in *BRCA1* and *BRCA2* were present at increased frequencies in individuals  
231 with a breast cancer diagnosis and ovary as an additional cancer site (Figure 3), such that 28.6%  
232 and 13.6% of individuals, respectively, were a carrier for at least one variant in the burden set.  
233 For *BRCA1*, there was also an increase of carriers with an additional melanoma (9.52%) or lung

234 cancer (9.52%) diagnosis. For *BRCA2*, there was an increase of carriers with an additional uterine  
235 (8.47%), lung (6.78%), or colorectal cancer (6.78%).

236

### 237 **Comparison of Mutation Burden in Individuals with Multiple versus Single Cancers**

238 Out of the 22 associated variants (above), 10 remained associated when comparing individuals  
239 with multiple cancers to those with single cancers (Table S6;  $p < 0.05$ ). Two of these variants  
240 were positively associated in our analysis of any 2+ primary cancers: rs555607708 (*CHEK2*; OR  
241 [95% CI] = 1.57 [1.09, 2.25],  $p = 0.015$ ) and rs146381257 (*ZNF106*; OR [95% CI] = 5.38 [1.07,  
242 27.18],  $p = 0.042$ ). The other eight variants were positively associated with diagnosis of a specific  
243 index cancer plus any other cancer versus the specific cancer alone (Table S6). Two of these  
244 eight variants were associated in our breast cancer-specific case-case analysis: rs7872034, a  
245 missense variant in *SMC2* (OR [95% CI] = 1.16 [1.05, 1.27],  $p = 0.0025$ ) and rs143745791, a  
246 missense variant in *NCBP1* (OR [95% CI] = 3.71 [2.08, 6.61],  $p = 8.37 \times 10^{-6}$ ).

247

248 Of the 11 findings from the gene-level burden analyses (above), seven remained positively  
249 associated with multiple cancers in comparison with single cancers ( $p < 0.05$ ; Table S7). Four of  
250 these genes were discovered in our case-case analysis of any 2+ primary cancers: *ATM* (OR  
251 [95% CI] = 1.20 [1.06, 1.36],  $p = 0.00399$ ), *CHEK2* (OR [95% CI] = 1.56 [1.23, 1.98],  $p = 2.31 \times 10^{-4}$ ),  
252 *SAMHD1* (OR [95% CI] = 1.56 [1.14, 2.13],  $p = 5.34 \times 10^{-3}$ ), and *BRCA2* (OR [95% CI] = 1.86  
253 [1.31, 2.65],  $p = 5.43 \times 10^{-4}$ ). *ATM* (OR [95% CI] = 1.31 [1.01, 1.68],  $p = 0.038$ ) was positively  
254 associated in our prostate cancer-specific case-case analysis, and the two remaining genes were  
255 positively associated in our breast cancer-specific case-case analysis: *BRCA1* (OR [95% CI] =  
256 2.38 [1.07, 5.30],  $p = 0.034$ ) and *BRCA2* (OR [95% CI] = 1.97 [1.22, 3.18],  $p = 0.0055$ ).

257

### 258 **DISCUSSION**

259 We investigated the genetic basis of carcinogenic pleiotropy through whole exome sequencing of  
260 individuals diagnosed with multiple primary cancers from two large, multi-ancestry study  
261 populations. Comparing individuals with multiple cancers to cancer-free controls uncovered 22  
262 independently associated variants, ten of which remained associated when comparing individuals  
263 with multiple cancers to those with a single cancer. We also found significant associations  
264 between the genes *AHCTF1*, *ATM*, *BRCA1/2*, *CHEK2*, *SAMHD1*, and *SLC6A2* and our multiple  
265 cancer phenotypes. Other than *AHCTF1* and *SLC6A2*, these genes remained associated with  
266 multiple cancer diagnoses when comparing to individuals with a single cancer. These findings  
267 offer insights into germline exome variants that increase an individual's risk of developing multiple  
268 primary cancers.

269

270 Compelling findings from our analyses of all individuals with more than one cancer diagnosis  
271 include associations with the rare variant rs146381257 in *ZNF106*. Carriers of the rs146381257  
272 risk allele (C) were primarily over-represented in individuals with at least one prostate, breast,  
273 lung, or urinary bladder cancer and in individuals with lymphoid neoplasms. Carriers also  
274 demonstrated an increased risk of developing multiple cancers compared to individuals with a  
275 single cancer. *ZNF106* is an RNA binding protein involved in post-transcriptional regulation and  
276 insulin receptor signaling. Although germline variation in *ZNF106* has not previously been  
277 associated with cancer risk, a recent study found it to be associated with worse urinary bladder  
278 cancer survival<sup>32</sup>.

279

280 Additional noteworthy findings from our analyses of all multiple primary cancers combined include  
281 cancer susceptibility signals in *SAMHD1* and *SLC6A2*. Carriers of rare and potentially deleterious  
282 variants in *SAMHD1*, a gene with a plausible tumor suppressor role<sup>33</sup>, had a significantly higher  
283 risk being diagnosed with multiple cancers compared to single cancers. Germline *SAMHD1*  
284 mutations are implicated in Aicardi-Goutieres Syndrome (AGS)<sup>34</sup>, an autosomal recessive

285 condition that results in autoimmune inflammatory encephalopathy. Most cancer-related studies  
286 have focused on the role of somatic alternations in *SAMHD1*<sup>35</sup>. However, a study of chronic  
287 lymphoid leukemia (CLL) proposed an oncogenic role of germline *SAMHD1* variation mediated  
288 by DNA repair mechanisms<sup>36</sup>. Consistent with this hypothesis, we also found increased *SAMHD1*  
289 variation in individuals with lymphoid neoplasms, as well as with prostate, breast, colorectal and  
290 lung cancers. *SLC6A2*, also known as *NAT1*, has been found to be prognostic for colon cancer<sup>37</sup>,  
291 and both in-vivo and in-vitro studies have linked expression to survival in many cancer types,  
292 including prostate<sup>38</sup> and breast<sup>39</sup>. Polymorphisms in *SLC6A2* may also interact with smoking  
293 exposure to modulate risk for tobacco-related cancers<sup>40</sup>. In our study, the increased cancer risk  
294 detected among *SLC6A2* carriers was limited to comparisons with cancer-free controls.

295

296 Because we compared multiple primary cancers with both cancer-free controls and individuals  
297 diagnosed with a single cancer, we were well positioned to explore patterns of pleiotropy and  
298 disentangle variation likely to be driven by single cancers. For example, we identified two variants,  
299 rs7872034 (missense variant in *SMC2*) and rs143745791 (missense variant in *NCBP1*),  
300 associated with a diagnosis of at least one breast cancer (plus any other cancer) versus no  
301 cancer. These variants remained associated with a diagnosis of breast and another cancer when  
302 comparing to individuals diagnosed with a single breast cancer. While rs7872034 is in high LD  
303 ( $r^2 = 0.98$ ) with a known breast cancer risk variant (rs4742903; *SMC2* intron)<sup>41</sup>, it may also  
304 increase the risk of developing multiple cancers. Regarding rs143745791, germline variants in  
305 *NCBP1* have not been previously associated with cancer; because it is rare (MAF < 0.2%), larger  
306 sequencing efforts may be necessary identify variation in studies of individuals with a single  
307 cancer. Expression of this gene has been found to promote lung cancer growth and poor  
308 prognosis<sup>42</sup>, and *NCBP1* is overexpressed in basal-like and triple-negative breast cancers<sup>43</sup>.  
309 Similarly, *BRCA1/2* germline variants are prevalent among these subtypes; however, in our study

310 populations, *BRCA1/2* carriers were more common among those with an additional ovarian  
311 cancer whereas *NCBP1* carriers more frequently had an additional cervical cancer.

312

313 In our prostate cancer-specific analysis comparing individuals with multiple cancers versus those  
314 with only a single cancer, we discovered an association with rs3020779, an eQTL for *RNF123*  
315 (also known as *KPC1*), which is a gene involved in p50 mediation and downstream stimulation of  
316 multiple tumor suppressors<sup>44</sup>. In our analysis of head and neck cancer, we detected an  
317 association with rs12253181 (eQTL for *RTKN2*); while this gene has not previously been  
318 associated with head and neck cancer risk, it has been shown to function as an oncogene in non-  
319 small cell lung cancer (NSCLC) and decreasing its expression may inhibit proliferation by inducing  
320 apoptosis<sup>45</sup>.

321

322 Limitations of our study included the identification of variants that were likely-somatic in our  
323 analyses of hematologic cancers due to an expansion of hematopoietic clonal populations with  
324 the same acquired mutation (i.e., CHIP). Confounding of germline testing by CHIP has been  
325 reported in *TP53*<sup>46</sup> and *TET2*<sup>47</sup>, so careful interpretation is critical to avoid unnecessary clinical  
326 intervention. An additional limitation of our, and other, studies are obtaining accurate effects  
327 estimates for rare variants and the reliance on available annotations for inclusion into gene-based  
328 tests. Replication of rare findings in larger cohorts and optimization of functional impact  
329 annotations could lead to more precise results. Also, while our approach did not allow for formal  
330 replication, it was designed to identify signals for a largely understudied phenotype that were  
331 concordant in two populations. Finally, while all individuals with multiple cancers were included in  
332 our study regardless of genetic ancestry, non-European ancestries were underrepresented;  
333 larger, more diverse cohorts will be needed to fully explore the genetic basis of multiple cancers.

334

335 Strengths of this work include studying individuals of multiple ancestries who were largely  
336 unselected for specific cancer phenotypes. We also performed the first ever exome-wide study  
337 of genetic susceptibility to multiple primary cancers, using two large prospective study  
338 populations. Our study design allowed us to characterize variation across multiple primary  
339 cancers representing 36 unique sites, as well as to conduct cancer-specific analyses of 16 sites.  
340 Using this approach, we confirmed many known single-variant and gene-based findings,  
341 strengthening and supporting our novel results reported for individual cancers through our cancer-  
342 specific analyses.

343

344 In summary, by undertaking an exome-wide survey of common and rare variation in two large  
345 study populations, we identified several variant and gene-based associations that may increase  
346 the risk of developing multiple cancers within individuals. Our findings have potential implications  
347 for improving our understanding of the shared mechanisms of carcinogenesis. They may also  
348 enable screening strategies that prioritize individuals at risk for developing additional cancers.  
349 Furthermore, since many of the genes reported here have been considered as potential  
350 therapeutic targets in cancer, our work supports the use of germline information to help guide  
351 precision medicine. Future studies should aim to replicate our findings and undertake experiments  
352 that validate the functionality of the discovered pleiotropic variants. Combined with future  
353 research, our results have potential to inform genetic counseling, improve risk prediction for  
354 multiple cancers, and guide novel treatment and drug development.



## **SUPPLEMENTAL DATA**

Supplements\_Tables.xls

## **ACKNOWLEDGEMENTS**

This material is based upon work supported by NIH grant R01 CA201358, RC2 AG036607, and the National Science Foundation Graduate Research Fellowship Program under Grant No. 1650113. Any opinions, findings, and conclusions or recommendations expressed in this material are those of the author(s) and do not necessarily reflect the views of the National Science Foundation. Support for study enrollment, survey administration, and biospecimen collection of Kaiser Permanente Research Bank participants was provided by the Robert Wood Johnson Foundation, the Wayne and Gladys Valley Foundation, the Ellison Medical Foundation, and Kaiser Permanente national and regional community benefit programs. Additionally, REG is supported by a Young Investigator Award from the Prostate Cancer Foundation. This research has been conducted using the UK Biobank Resource under Application Number 14015. Furthermore, the authors thank the Regeneron Genetics Center for covering the costs of whole-exome sequencing of the Kaiser Permanente Research Bank study participants.

## **REGENERON GENETICS CENTER AUTHOR LIST AND CONTRIBUTION**

### **RGC Management and Leadership Team**

Goncalo Abecasis, D.Phil. , Aris Baras, M.D. , Michael Cantor, M.D. , Giovanni Coppola, M.D. , Andrew Deubler , Aris Economides, Ph.D. , Katia Karalis, Ph.D. , Luca A. Lotta, M.D., Ph.D. , John D. Overton, Ph.D. , Jeffrey G. Reid, Ph.D. , Katherine Siminovitch, M.D. , Alan Shuldiner, M.D.

### **Sequencing and Lab Operations**

Christina Beechert , Caitlin Forsythe, M.S. , Erin D. Fuller , Zhenhua Gu, M.S. , Michael Lattari , Alexander Lopez, M.S., John D. Overton, Ph.D. , Maria Sotiropoulos Padilla, M.S. , Manasi Pradhan, M.S. , Kia Manoochehri, B.S. , Thomas D. Schleicher, M.S. , Louis Widom , Sarah E. Wolf, M.S. , Ricardo H. Ulloa, B.S.

### **Clinical Informatics**

Amelia Averitt, Ph.D. , Nilanjana Banerjee, Ph.D. , Michael Cantor, M.D. , Dadong Li, Ph.D. , Sameer Malhotra, M.D. , Deepika Sharma, MHI , Jeffrey Staples , Ph.D.

### **Genome Informatics**

Xiaodong Bai, Ph.D. , Suganthi Balasubramanian, Ph.D. , Suying Bao, Ph.D. , Boris Boutkov, Ph.D. , Siying Chen, Ph.D. , Gisu Eom, B.S. , Lukas Habegger, Ph.D. , Alicia Hawes, B.S. , Shareef Khalid , Olga Krasheninina, M.S. , Rouel Lanche, B.S. , Adam J. Mansfield, B.A. , Evan K. Maxwell, Ph.D. , George Mitra, B.A. , Mona Nafde, M.S. , Sean O’Keeffe, Ph.D. , Max Orelus, B.B.A. , Razvan Panea, Ph.D. , Tommy Polanco, B.A. , Ayesha Rasool, M.S. , Jeffrey G. Reid, Ph.D. , William Salerno, Ph.D. , Jeffrey C. Staples, Ph.D. , Kathie Sun, Ph.D. , Jiwen Xin, Ph.D.

### **Analytical Genomics and Data Science**

Goncalo Abecasis, D.Phil. , Joshua Backman, Ph.D. , Amy Damask, Ph.D. , Lee Dobbyn, Ph.D. , Manuel Allen Revez Ferreira, Ph.D. , Arkopravo Ghosh, M.S. , Christopher Gillies, Ph.D. , Lauren Gurski, B.S. , Eric Jorgenson, Ph.D. , Hyun Min Kang, Ph.D. , Michael Kessler, Ph.D. , Jack Kosmicki, Ph.D. , Alexander Li , Ph.D. , Nan Lin, Ph.D. , Daren Liu, M.S. , Adam Locke, Ph.D. , Jonathan Marchini, Ph.D. , Anthony Marcketta, M.S. , Joelle Mbatchou, Ph.D. , Arden Moscati, Ph.D. , Charles Paulding, Ph.D. , Carlo Sidore, Ph.D. , Eli Stahl, Ph.D. , Kyoko Watanabe, Ph.D. , Bin Ye, Ph.D. , Blair Zhang, Ph.D. , Andrey Ziyatdinov, Ph.D.

### **Research Program Management & Strategic Initiatives**

Marcus B. Jones, Ph.D. , Jason Mighty, Ph.D. , Lyndon J. Mitnaul, Ph.D.

## **WEB RESOURCES**

REGENIE

SnEff

ANNOVAR

dbNSFPv3.5

flashPCA2

bcftools

plink

## **DATA AVAILABILITY**

All results from this study are available from the article or Supplementary Materials. The UK Biobank cohort data is publicly available from the UK Biobank access portal at <https://www.ukbiobank.ac.uk>. The Kaiser Permanente Research Bank data are available on dbGAP. All remaining relevant data are available in the article, supplementary information, or from the corresponding author upon reasonable request.

## REFERENCES

1. Vogt, A. *et al.* Multiple primary tumours: challenges and approaches, a review. *ESMO Open* **2**, e000172 (2017).
2. Copur, M. S. & Manapuram, S. Multiple Primary Tumors Over a Lifetime. *Oncology (Williston Park)* **33**, 629384 (2019).
3. Gaspar, T. B. *et al.* Telomere Maintenance Mechanisms in Cancer. *Genes* **9**, 241 (2018).
4. Smedby, K. E. *et al.* GWAS of Follicular Lymphoma Reveals Allelic Heterogeneity at 6p21.32 and Suggests Shared Genetic Susceptibility with Diffuse Large B-cell Lymphoma. *PLoS Genet* **7**, e1001378 (2011).
5. Karnes, J. H. *et al.* Phenome-wide scanning identifies multiple diseases and disease severity phenotypes associated with HLA variants. *Sci. Transl. Med.* **9**, eaai8708 (2017).
6. Huppi, K., Pitt, J. J., Wahlberg, B. M. & Caplen, N. J. The 8q24 Gene Desert: An Oasis of Non-Coding Transcriptional Activity. *Front. Gene.* **3**, (2012).
7. Rashkin, S. R. *et al.* Pan-cancer study detects genetic risk variants and shared genetic basis in two large cohorts. *Nat Commun* **11**, 4423 (2020).
8. Lindström, S. *et al.* Quantifying the Genetic Correlation between Multiple Cancer Types. *Cancer Epidemiol Biomarkers Prev* **26**, 1427–1435 (2017).
9. Hoffmann, T. J. *et al.* Imputation of the Rare HOXB13 G84E Mutation and Cancer Risk in a Large Population-Based Cohort. *PLoS Genet* **11**, e1004930 (2015).
10. Szustakowski, J. D. *et al.* *Advancing Human Genetics Research and Drug Discovery through Exome Sequencing of the UK Biobank.*  
<http://medrxiv.org/lookup/doi/10.1101/2020.11.02.20222232> (2020)  
doi:10.1101/2020.11.02.20222232.
11. Rashkin, S. R. *et al.* Pan-Cancer Study Detects Novel Genetic Risk Variants and Shared Genetic Basis in Two Large Cohorts. *bioRxiv* 635367 (2019) doi:10.1101/635367.

12. Graff, R. E. *et al.* *Cross-Cancer Evaluation of Polygenic Risk Scores for 17 Cancer Types in Two Large Cohorts*. <http://biorxiv.org/lookup/doi/10.1101/2020.01.18.911578> (2020)  
doi:10.1101/2020.01.18.911578.
13. Adamo, M., Groves, C., Dickie, L. & Ruhl, J. SEER Program Coding and Staging Manual 2021. *National Cancer Institute, Bethesda, MD 20892*. (2020).
14. Harris, N. L. *et al.* The World Health Organization Classification of Neoplasms of the Hematopoietic and Lymphoid Tissues: Report of the Clinical Advisory Committee Meeting – Airlie House, Virginia, November, 1997. *Hematol J* **1**, 53–66 (2000).
15. Abraham, G., Qiu, Y. & Inouye, M. FlashPCA2: principal component analysis of Biobank-scale genotype datasets. *Bioinformatics* **33**, 2776–2778 (2017).
16. The 1000 Genomes Project Consortium. A global reference for human genetic variation. *Nature* **526**, 68–74 (2015).
17. Geisinger-Regeneron DiscovEHR Collaboration *et al.* Exome sequencing and characterization of 49,960 individuals in the UK Biobank. *Nature* **586**, 749–756 (2020).
18. Yun, T. *et al.* Accurate, scalable cohort variant calls using DeepVariant and GLnexus. *Bioinformatics* **36**, 5582–5589 (2021).
19. Mbatchou, J. *et al.* Computationally efficient whole-genome regression for quantitative and binary traits. *Nat Genet* **53**, 1097–1103 (2021).
20. Cingolani, P. *et al.* A program for annotating and predicting the effects of single nucleotide polymorphisms, SnpEff: SNPs in the genome of *Drosophila melanogaster* strain w1118; iso-2; iso-3. *Fly (Austin)* **6**, 80–92 (2012).
21. Dong, C. *et al.* Comparison and integration of deleteriousness prediction methods for nonsynonymous SNVs in whole exome sequencing studies. *Human Molecular Genetics* **24**, 2125–2137 (2015).
22. Wang, K., Li, M. & Hakonarson, H. ANNOVAR: functional annotation of genetic variants from high-throughput sequencing data. *Nucleic Acids Research* **38**, e164–e164 (2010).

23. Backman, J. D. *et al.* Exome sequencing and analysis of 454,787 UK Biobank participants. *Nature* **599**, 628–634 (2021).
24. Han, B. & Eskin, E. Random-Effects Model Aimed at Discovering Associations in Meta-Analysis of Genome-wide Association Studies. *The American Journal of Human Genetics* **88**, 586–598 (2011).
25. Viechtbauer, W. Conducting Meta-Analyses in *R* with the **metafor** Package. *J. Stat. Soft.* **36**, (2010).
26. Steensma, D. P. *et al.* Clonal hematopoiesis of indeterminate potential and its distinction from myelodysplastic syndromes. *Blood* **126**, 9–16 (2015).
27. Cybulski, C. *et al.* CHEK2 Is a Multiorgan Cancer Susceptibility Gene. *The American Journal of Human Genetics* **75**, 1131–1135 (2004).
28. Amos, C. I. *et al.* Genome-wide association study identifies novel loci predisposing to cutaneous melanoma. *Hum Mol Genet* **20**, 5012–5023 (2011).
29. Li, H., Fei, X., Shen, Y. & Wu, Z. Association of gene polymorphisms of KLK3 and prostate cancer: A meta-analysis. *Adv Clin Exp Med* **29**, 1001–1009 (2020).
30. Hazelett, D. J. *et al.* Comprehensive functional annotation of 77 prostate cancer risk loci. *PLoS Genet* **10**, e1004102 (2014).
31. Hutter, C. M. *et al.* Characterization of the association between 8q24 and colon cancer: gene-environment exploration and meta-analysis. *BMC Cancer* **10**, 670 (2010).
32. Wu, Y. *et al.* Identification of the Functions and Prognostic Values of RNA Binding Proteins in Bladder Cancer. *Front. Genet.* **12**, 574196 (2021).
33. Herold, N. *et al.* With me or against me: Tumor suppressor and drug resistance activities of SAMHD1. *Experimental Hematology* **52**, 32–39 (2017).
34. Martinez-Lopez, A. *et al.* SAMHD1 deficient human monocytes autonomously trigger type I interferon. *Molecular Immunology* **101**, 450–460 (2018).

35. Mauney, C. H. & Hollis, T. SAMHD1: Recurring roles in cell cycle, viral restriction, cancer, and innate immunity. *Autoimmunity* **51**, 96–110 (2018).
36. Clifford, R. *et al.* SAMHD1 is mutated recurrently in chronic lymphocytic leukemia and is involved in response to DNA damage. *Blood* **123**, 1021–1031 (2014).
37. Shi, C. *et al.* Hypermethylation of N-Acetyltransferase 1 Is a Prognostic Biomarker in Colon Adenocarcinoma. *Front. Genet.* **10**, 1097 (2019).
38. Tiang, J. M., Butcher, N. J., Cullinane, C., Humbert, P. O. & Minchin, R. F. RNAi-Mediated Knock-Down of Arylamine N-acetyltransferase-1 Expression Induces E-cadherin Up-Regulation and Cell-Cell Contact Growth Inhibition. *PLoS ONE* **6**, e17031 (2011).
39. Minchin, R. F. & Butcher, N. J. Trimodal distribution of arylamine N-acetyltransferase 1 mRNA in breast cancer tumors: association with overall survival and drug resistance. *BMC Genomics* **19**, 513 (2018).
40. McKay, J. D. *et al.* Sequence Variants of NAT1 and NAT2 and Other Xenometabolic Genes and Risk of Lung and Aerodigestive Tract Cancers in Central Europe. *Cancer Epidemiology Biomarkers & Prevention* **17**, 141–147 (2008).
41. kConFab Investigators *et al.* Genome-wide association study identifies 32 novel breast cancer susceptibility loci from overall and subtype-specific analyses. *Nat Genet* **52**, 572–581 (2020).
42. Zhang, H. *et al.* NCBP1 promotes the development of lung adenocarcinoma through up-regulation of CUL4B. *J Cell Mol Med* **23**, 6965–6977 (2019).
43. Wang, L. *et al.* Novel RNA-Affinity Proteogenomics Dissects Tumor Heterogeneity for Revealing Personalized Markers in Precision Prognosis of Cancer. *Cell Chemical Biology* **25**, 619-633.e5 (2018).
44. Kravtsova-Ivantsiv, Y. *et al.* Excess of the NF- $\kappa$ B p50 subunit generated by the ubiquitin ligase KPC1 suppresses tumors via PD-L1– and chemokines-mediated mechanisms. *Proc Natl Acad Sci USA* **117**, 29823–29831 (2020).

45. Ji, L. *et al.* RTKN2 is Associated with Unfavorable Prognosis and Promotes Progression in Non-Small-Cell Lung Cancer. *OTT Volume 13*, 10729–10738 (2020).
46. Weitzel, J. N. *et al.* Somatic TP53 variants frequently confound germ-line testing results. *Genetics in Medicine 20*, 809–816 (2018).
47. Tulstrup, M. *et al.* TET2 mutations are associated with hypermethylation at key regulatory enhancers in normal and malignant hematopoiesis. *Nat Commun 12*, 6061 (2021).



## FIGURE TITLES AND LEGENDS

**Figure 1.** Cancer Diagnosis Pairs Present in the Combined Study Populations

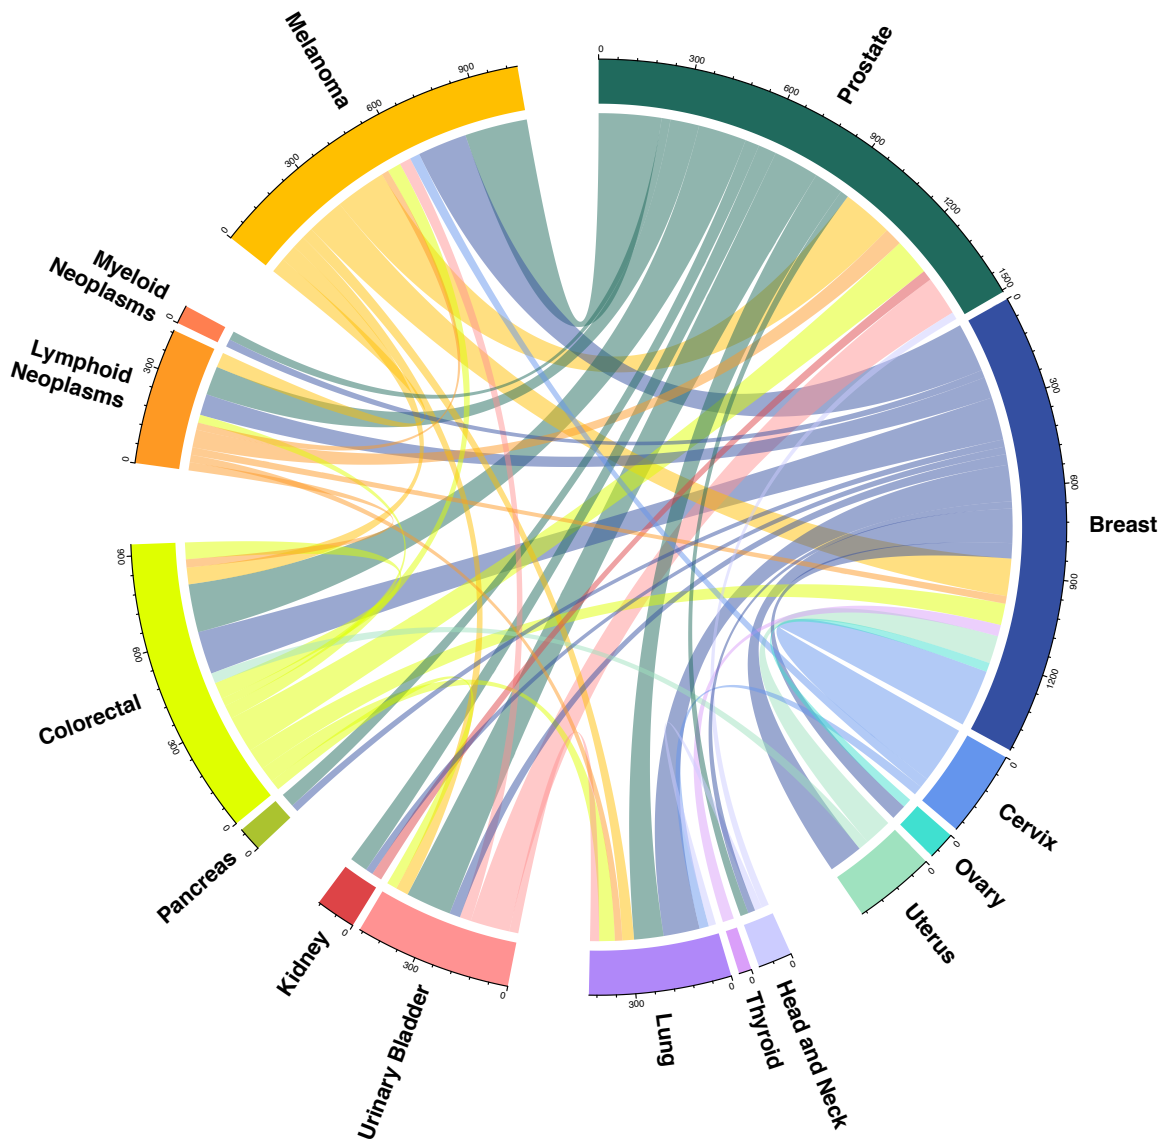

**Figure 1 Legend:** Circos plot describing the pairs of first and second cancer diagnoses with at least 25 cases present in Kaiser Permanente Research Bank and the UK Biobank study populations combined. Each connection reflects the number of cases with both of the linked primary cancers, where the color of the line shows the first cancer site diagnosed.

**Figure 2.** Germline Single Variant Association Results for Multiple Primary Cancers Combined or Grouped by Organ Site

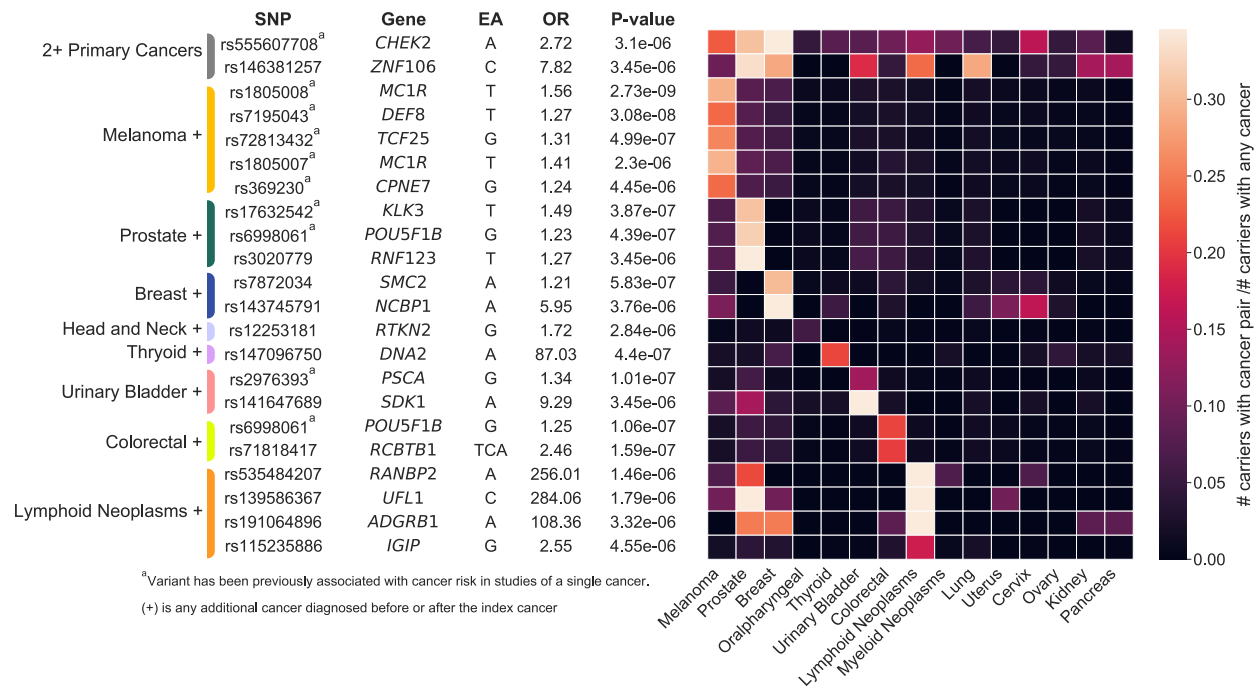

**Figure 2 Legend:** Suggestive ( $p < 5 \times 10^{-6}$ ) germline variant associations with multiple cancer phenotypes versus cancer-free controls ( $n = 165,853$ ) following a fixed-effects meta-analysis of Kaiser Permanente Research Bank and UK Biobank WES data. Associations were detected for any 2+ primary cancers ( $n = 6,429$ ) and with groups of cases defined by a shared index cancer, at any time point, plus any other cancer diagnosis: melanoma + ( $n = 1,443$ ), prostate + ( $n = 1,977$ ), breast + ( $n = 1,874$ ), head and neck + ( $n = 283$ ), thyroid + ( $n = 198$ ), urinary bladder + ( $n = 829$ ), colorectal + ( $n = 1,324$ ), lymphoid neoplasms + ( $n = 728$ ). Variants that have been previously associated in single cancer studies have superscript (a). The heatmap reflects the number of carriers with the risk-increasing allele for each associated variant with the index (y-axis) and additional (x-axis) cancer over the total number of carriers, restricting to cancer cases. When the index and additional cancer are the same, the heatmap value represents all carriers with the specified cancer diagnosis divided by the total number of carriers. Abbreviations: SNP – single nucleotide polymorphism; EA – effect allele; OR – odds ratio.

**Figure 3.** Germline Gene Based Association Results for Multiple Primary Cancers Combined or Grouped by Organ Site

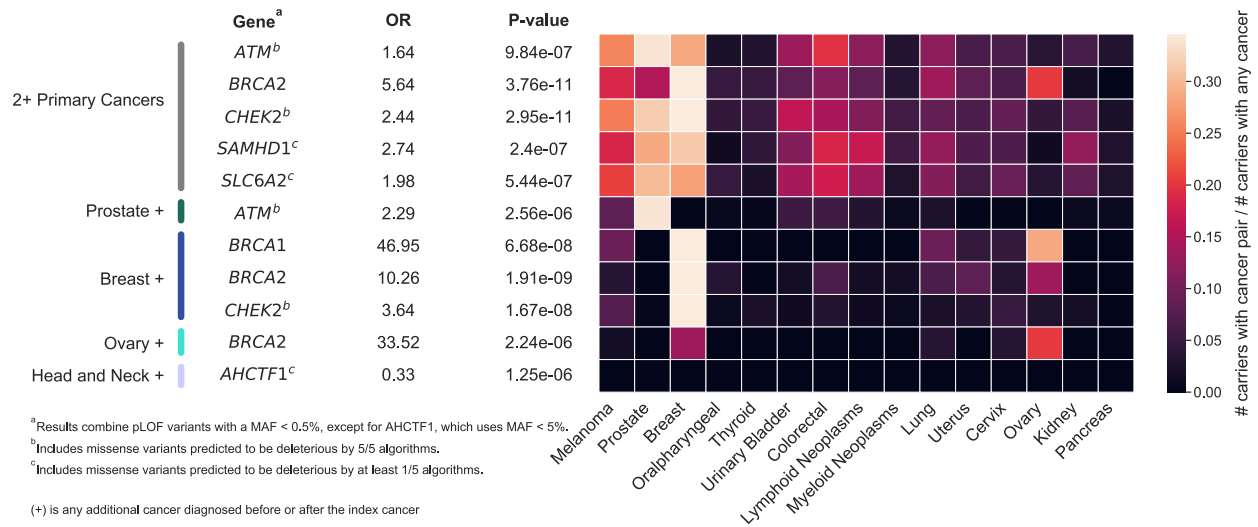

**Figure 3 Legend:** Burden tests were performed combining variants defined as pLOF with or without deleterious missense variants, defining deleteriousness by at least one (1/5) or all five (5/5) prediction algorithms used (Methods), at a MAF < 0.5%, 1%, or 5%. Following a fixed-effects meta-analysis of Kaiser Permanente Research Bank and UK Biobank data, Bonferroni significant associations ( $p < 2.65 \times 10^{-6} = 0.05 / 18,842$ ) corrected for the number of genes tested were found for comparisons of cancer-free controls ( $n = 165,853$ ) with all cases with any 2+ primary cancers ( $n = 6,429$ ) and with groups of cases defined by an index cancer for the following phenotypes: prostate + ( $n = 1,977$ ), breast + ( $n = 1,874$ ), ovary + ( $n = 239$ ), and head and neck + ( $n = 283$ ). For each gene, the variant grouping with the smallest p-value and fewest number of variants was selected. The heatmap reflects the number of carriers of each associated variant, with the index (y-axis) and additional (x-axis) cancer over the total number of carriers, where carrier is defined as having at least one alternate allele across all variants in a given gene, restricting to cancer cases. When the index and additional cancer are the same, the heatmap value represents all carriers with the specified cancer diagnosis divided by the total number of carriers. Abbreviations: OR – odds ratio; pLOF – predicted loss of function.

## TABLES

**Table 1.** Characteristics of the Kaiser Permanente Research Bank and UK Biobank study populations by ancestry group. Cases are individuals with multiple primary cancers. Controls are those without any cancer.

| Ancestry   | Population: Kaiser Permanente Research Bank |          |            |          |          |            | Population: UK Biobank |          |            |          |          |            |
|------------|---------------------------------------------|----------|------------|----------|----------|------------|------------------------|----------|------------|----------|----------|------------|
|            | Cases                                       |          |            | Controls |          |            | Cases                  |          |            | Controls |          |            |
|            | N                                           | Mean Age | Female (%) | N        | Mean Age | Female (%) | N                      | Mean Age | Female (%) | N        | Mean Age | Female (%) |
| <b>AFR</b> | 99                                          | 70.5     | 33.3       | 100      | 70.4     | 32.0       | 29                     | 55.9     | 51.7       | 3,292    | 51.8     | 60.4       |
| <b>EAS</b> | 95                                          | 69.7     | 49.5       | 91       | 69.5     | 49.5       | 10                     | 58.8     | 80.0       | 1,009    | 52.6     | 66.9       |
| <b>EUR</b> | 2,786                                       | 72.8     | 43.0       | 2815     | 72.9     | 43.3       | 3,249                  | 61.9     | 51.7       | 154,047  | 56.6     | 54.6       |
| <b>LAT</b> | 131                                         | 69.5     | 46.6       | 130      | 69.5     | 45.4       | 5                      | 63.8     | 80.0       | 334      | 51.8     | 62.6       |
| <b>SAS</b> | -                                           | -        | -          | -        | -        | -          | 25                     | 58.2     | 60.0       | 4,035    | 53.3     | 47.0       |
